# Supplementary material
Source: PubMed Central journal article supplement (PMC4688041)
Supplement: NIHMS744413-supplement-supplementary_file.pdf [file NIHMS744413-supplement-supplementary_file.pdf]

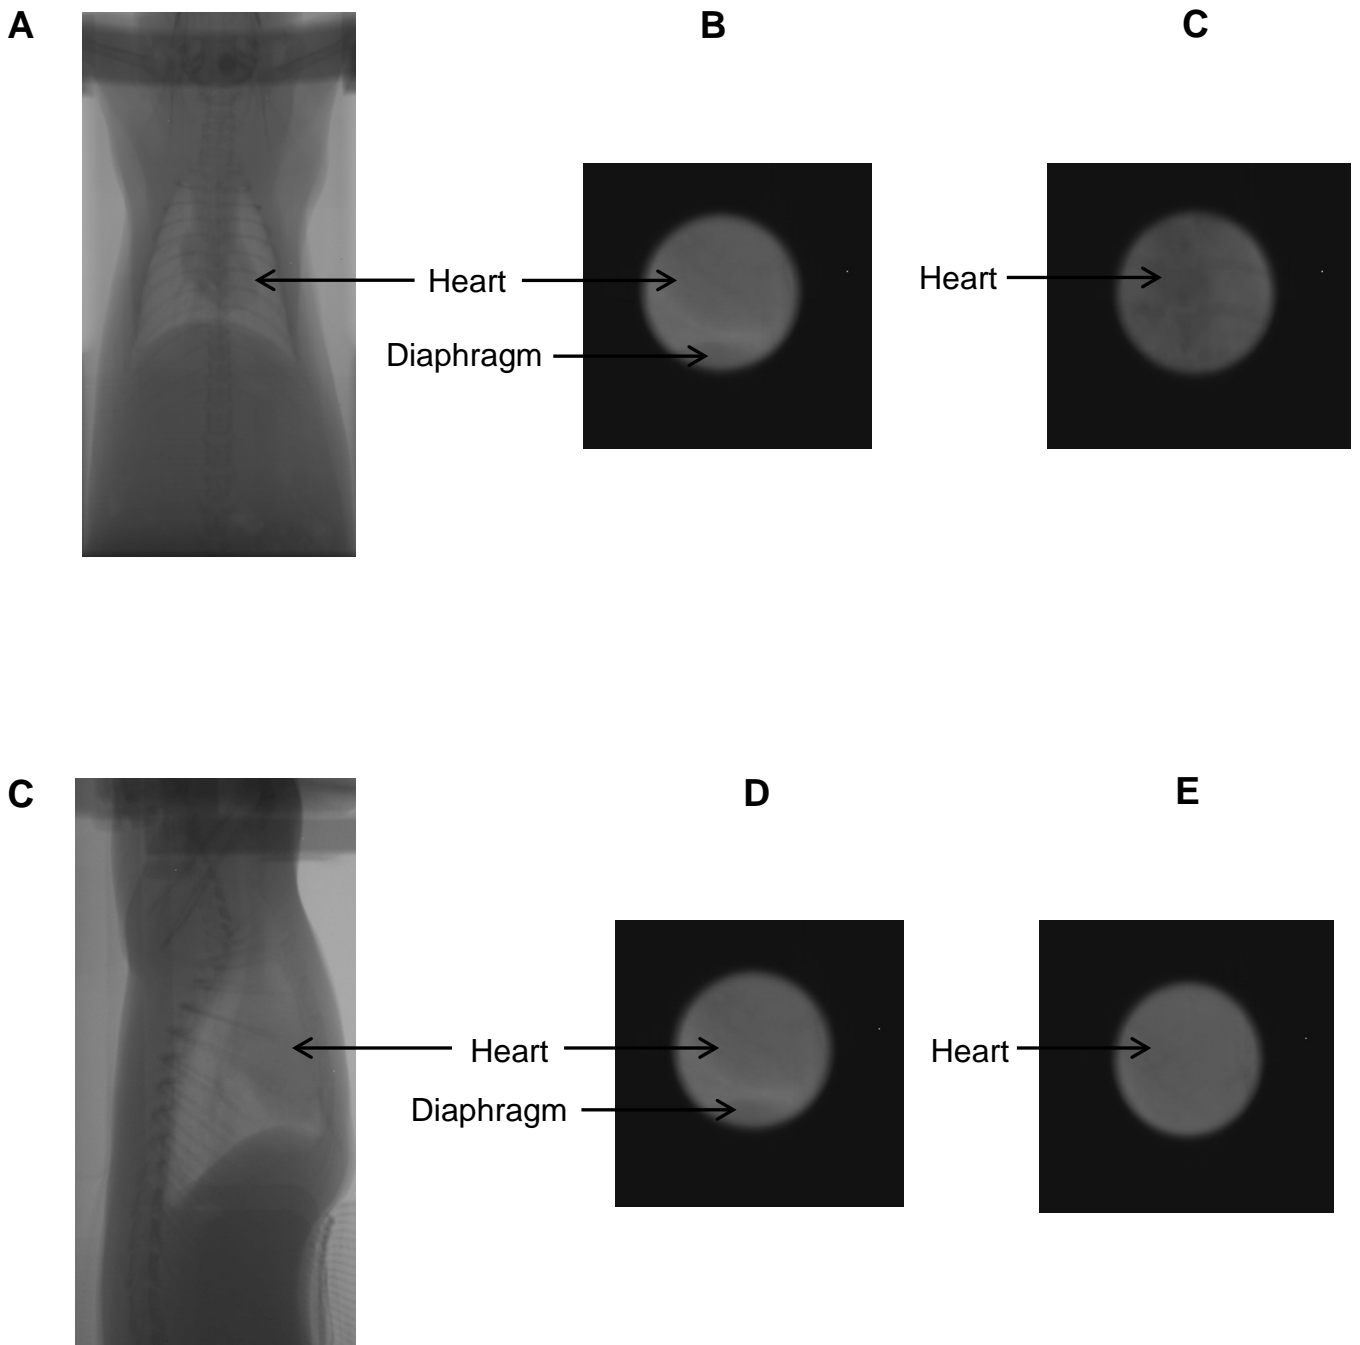

**Supplementary Figure S1. Image guided irradiation of the rat heart.** (A) X-ray image of rat, anesthetized and placed vertically in a plexiglas holder. (B) Collimator is attached to the X-ray tube and diaphragm is used as a landmark to guide the collimator to the heart. (C) Once the collimator is covering the heart only, the animal will be irradiated. (D) X-ray image of rat turned at  $90^\circ$  from (A). (D & E) The same strategy is used to identify and irradiate the heart.

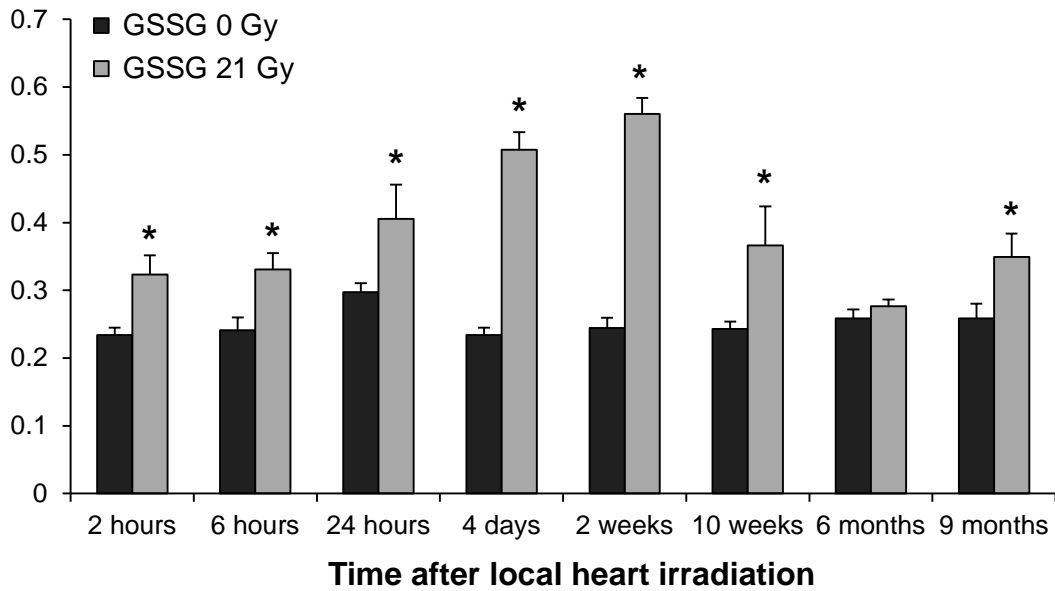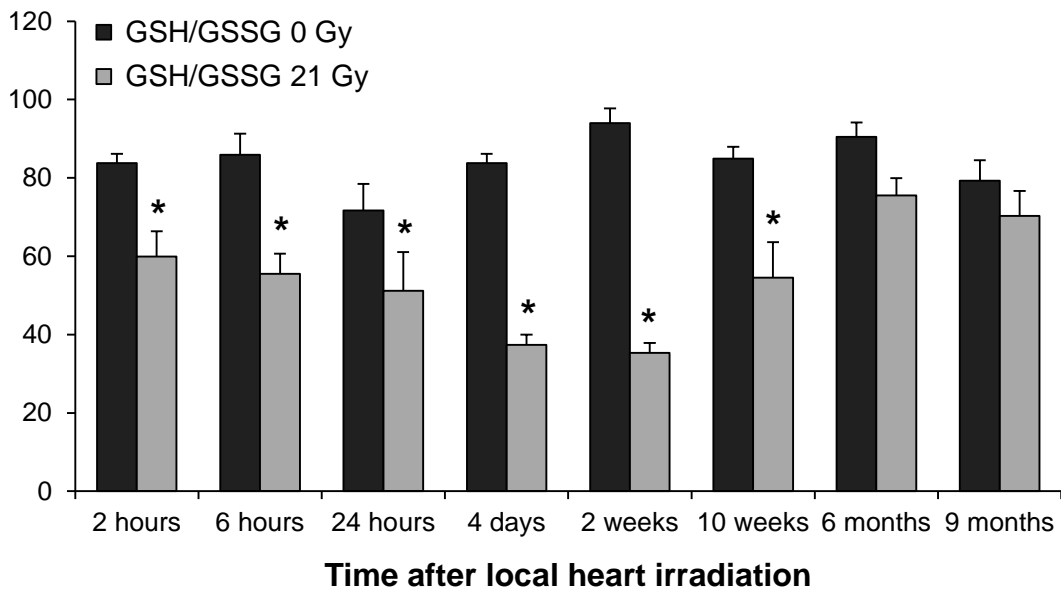

**Supplementary Figure S2.** HPLC analysis of reduced glutathione (GSH) and oxidized glutathione (GSSG) in left ventricles at 2 hours to 9 months after local heart irradiation in adult male Sprague-Dawley rats. A radiation-induced increase in GSSG levels caused a significant decrease in GSH/GSSG ratios from 2 hours up to 10 weeks after irradiation. GSH and GSSG levels were calculated as nmol per mg total protein. Data are presented as average  $\pm$  sem,  $n = 3-6$ . \* $p < 0.05$  compared to time-matched sham-irradiated control.

**A**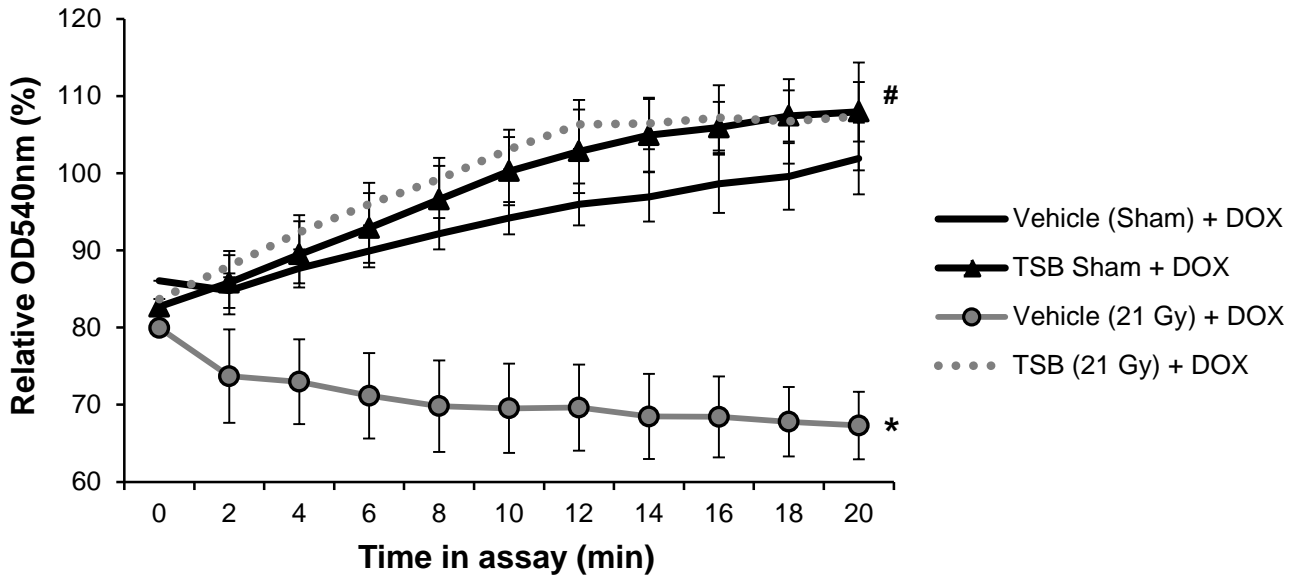**B**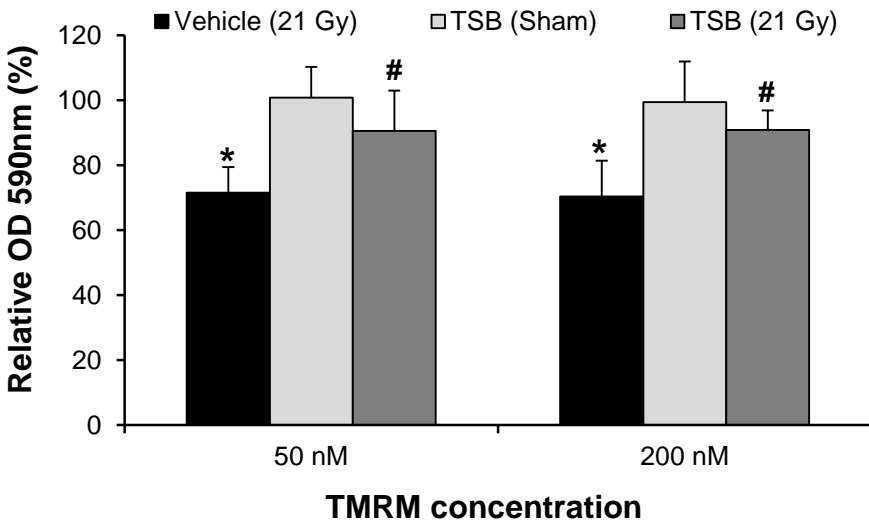

**Supplementary Figure S3. Effects of radiation and TSB on mitochondrial membrane properties.** (A) Swelling assays with mitochondria isolated from left ventricle at 2 weeks after irradiation and *ex vivo* exposed to doxorubicin. Swelling is expressed as mitochondrial optical density at 540 nm (OD<sub>540nm</sub>), relative to OD<sub>540nm</sub> immediately before the start of the assay. Doxorubicin (DOX, 5  $\mu$ M) caused significant swelling in mitochondria isolated from irradiated hearts only. Swelling was inhibited by the mPTP inhibitor cyclosporin A (CsA), indicating that swelling was due to enhanced mPTP opening. (B) Mitochondrial membrane potential, as assessed by mitochondrial uptake of TMRM at 2 weeks and 28 weeks after irradiation. TMRM uptake is expressed as OD<sub>590nm</sub> relative to that of mitochondria isolated from sham-irradiated hearts. Average  $\pm$  sem, n=5-6. \*p<0.05 compared to sham-irradiated control, #p<0.05 compared to vehicle-pretreated irradiated.

### 2 weeks post-irradiation

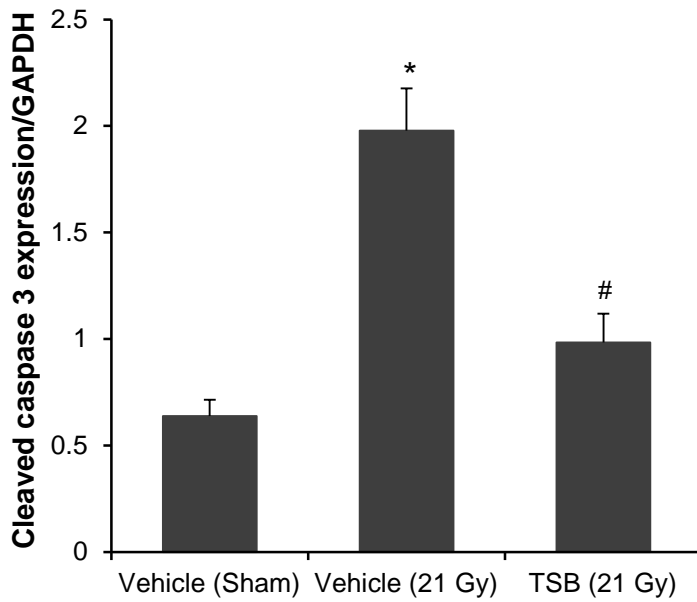

### 28 weeks post-irradiation

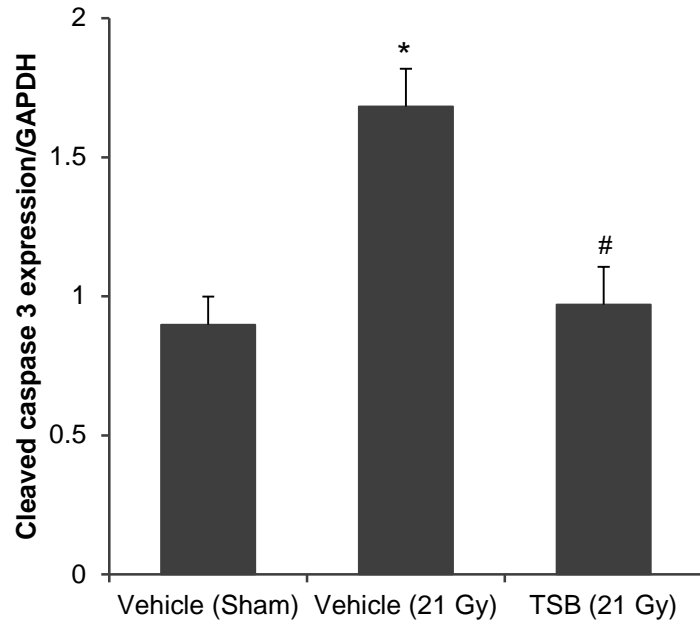

### 2 weeks post-irradiation

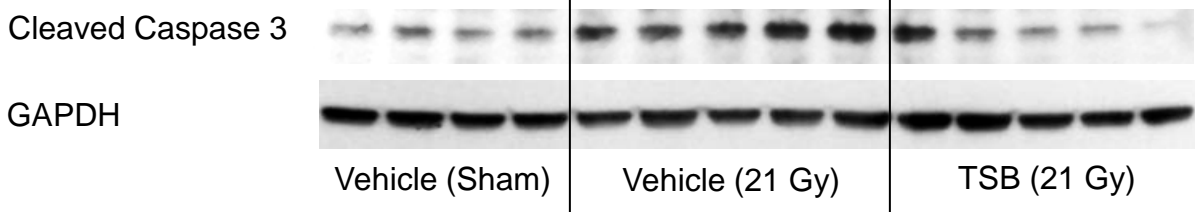

### 28 weeks post-irradiation

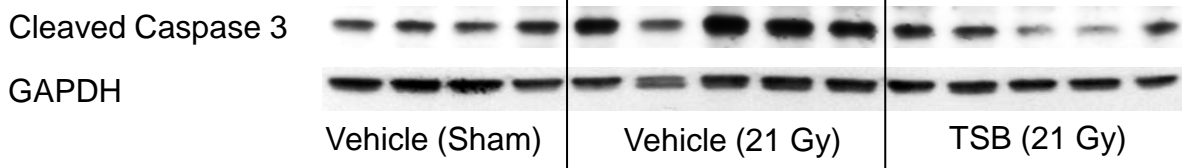

**Supplementary Figure S4. Effects of radiation and TSB on protein levels of cleaved caspase 3.** (A) Local heart irradiation caused an increase in left ventricular cleaved caspase 3 levels at both 2 weeks and 28 weeks after irradiation. TSB-pretreated groups were not significantly different from vehicle-pretreated sham controls. (B) Representative Western-Blot image of cleaved caspase 3. Average  $\pm$  sem, n=5-6. \*p<0.05 compared to sham-irradiated control. #p<0.05 compared to vehicle-pretreated irradiated.

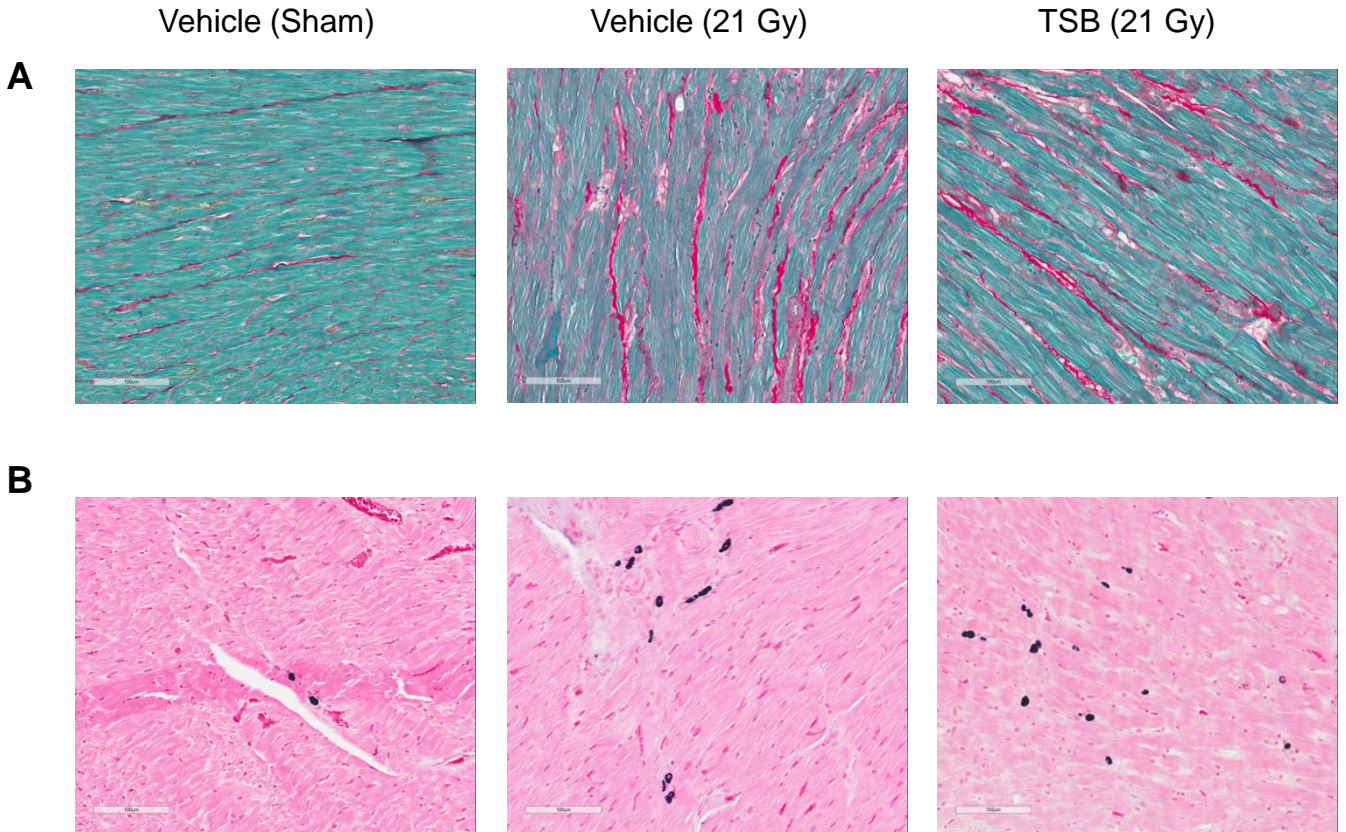

**Supplementary Figure S5. Representative images of histological staining at 28 weeks after irradiation.** (A) Left ventricular collagen deposition as indicated by Sirius Red + Fast Green. (B) Mast cells as indicated by Toluidine Blue with Eosin background staining. Mast cells are stained blue. 20X magnification, scale bar 100  $\mu$ m.
